# Supplementary material for: Systemically Administered Reovirus-Induced Downregulation of Hypoxia Inducible Factor-1α in Subcutaneous Tumors
Source: PubMed Central journal article supplement — Mol Ther Oncolytics. 2018 Dec 31;12:162–72. doi: 10.1016/j.omto.2018.12.012 (PMC6369106; doi:10.1016/j.omto.2018.12.012), 2018-12-31
Supplement: mmc1.pdf [file mmc1.pdf]

**OMTO, Volume 12**

**Supplemental Information**

**Systemically Administered Reovirus-Induced  
Downregulation of Hypoxia Inducible Factor-1 $\alpha$   
in Subcutaneous Tumors**

**Takuma Hotani, Hiroyuki Mizuguchi, and Fuminori Sakurai**

Supplemental figures

Figure S1

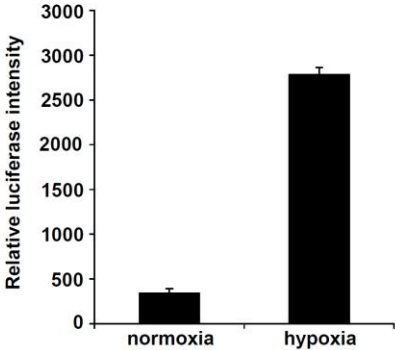

Figure S2

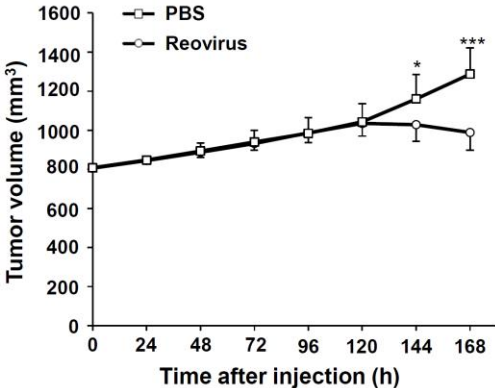

Figure S3

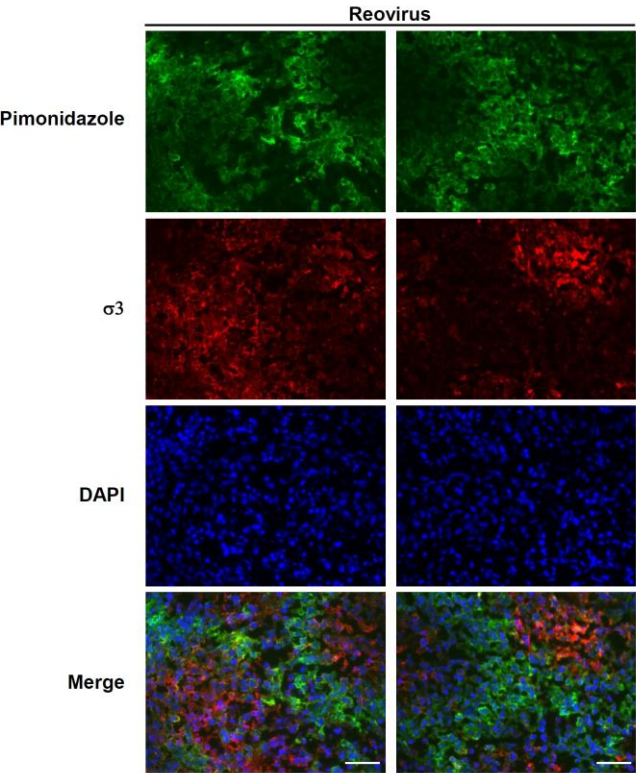

## Supplemental figure legends

### **Figure S1. Luciferase expression levels in H1299-5HRE-Luc cells under normoxic and hypoxic conditions.**

H1299-5HRE-Luc cells were incubated under normoxic or hypoxic conditions for 24 hrs, then subjected to luciferase assay. The data represent the mean±S.D. (n = 4). The experiments were repeated at least twice.

### **Figure S2. Tumor growth following reovirus administration.**

Reovirus ( $1 \times 10^8$  PFU/mouse) or PBS was intravenously administered into H1299-5HRE-Luc tumor-bearing mice *via* the tail vein. Tumor volumes were measured following reovirus administration at the indicated time points. The data represent the mean±S.D. (n = 7-10). \*p < 0.05 and \*\*\*p<0.001, compared with the PBS group. The experiments were repeated at least twice.

### **Figure S3. Pimonidazole-positive hypoxic area and reovirus capsid protein-positive area in the tumors following reovirus administration.**

Tumor-bearing mice were treated as described in Figure 2. Immunohistochemical analysis using anti-pimonidazole (green), anti-reovirus capsid protein  $\sigma 3$  (red) and DAPI (blue) was carried out using frozen sections of the tumor xenografts at 120 hrs following reovirus systemic administration. Scale bars, 50  $\mu$ m. The experiments were repeated at least twice.

**Supplemental table**

**S1 Table. Primer sequences**

| Gene symbol | Sequence (forward/reverse; 5' to 3')          |
|-------------|-----------------------------------------------|
| SLC2A1      | ATTGGCTCCGGTATCGTCAAC/GCTCAGATAGGACATCCAGGGTA |
| ABCB1       | TTGCTGCTTACATTCAGGTTTCA/AGCCTATCTCCTGTCGCATTA |
| MMP2        | GATACCCCTTTGACGGTAAGGA/CCTTCTCCAAGGTCCATAGC   |
| TWIST1      | GTCCGCAGTCTTACGAGGAG/GCTTGAGGGTCTGAATCTTGCT   |
| VEGFA       | AGGGCAGAATCATCACGAAGT/AGGGTCTCGATTGGATGGCA    |
| 18S rRNA    | GTAACCCGTTGAACCCATT/CCATCCAATCGGTAGTAGCG      |
